# Supplementary material
Source: MDPI journal article supplement (https://www.mdpi.com/2673-4168/2/4/30)
Supplement: s1 [file s1]

## Supplementary material

**Table S1.** Comparison of metabolic data between groups with and without MS

| Variable                 | Without SM<br>(n=11) | With SM<br>(n=36)   | p             | Effect Size |
|--------------------------|----------------------|---------------------|---------------|-------------|
| Age (Years)              | 36.73±7.74           | 41.89±8.62          | 0.083         | 0.630       |
| Weight (kg)              | 126.81±23.88         | 120.82±15.56        | 0.30          | 0.297       |
| Height (m)               | 1.60±0.049           | 1.58±0.062          | 0.53          | 0.036       |
| BMI (kg/m <sup>2</sup> ) | 49.50±8.65           | 48.04±6.121         | 0.5           | 0.033       |
| WC (cm)                  | 128.63±16.15         | 131.63±11.10        | 0.48          | 0.216       |
| HC (cm)                  | 147.21±17.11         | 144.64±12.35        | 0.58          | 0.172       |
| WHR                      | 0.877±0.094          | 0.911±0.055         | 0.14          | 0.441       |
| Glucose (mg/dL)          | 91.45±5.37           | 121.61±53.33        | 0.07          | 0.795       |
| HOMA-IR                  | 5.19±2.59            | <b>7.63±3.91</b>    | <b>0.05*</b>  | 0.735       |
| HBA1c                    | 5.73±0.23            | 6.49±1.44           | 0.09          | 0.737       |
| TG (mg/dL)               | 92.64±24.91          | <b>162.31±65.65</b> | <b>0.001*</b> | 1.403       |
| HDL (mg/dL)              | <b>53±12.36</b>      | 44.89±9.01          | <b>0.02*</b>  | 4.101       |
| TG/HDL-c                 | 1.80±0.54            | <b>3.87±1.89</b>    | <b>0.001*</b> | 1.489       |
| PCR                      | 1.13±1.03            | 1.25±1.03           | 0.72          | 0.116       |

BMI: Body Mass Index; WC: Waist circumference; HC: hip circumference; HOMA-IR: homeostasis model assessment of insulin resistance; WHR: Waist-to-hip ratio; HBA1c: Glycolated Hemoglobin; TG: triglycerides; HDL-c: High Density Lipoprotein; \* General Linear Model (GLM).

**Table S2.** Association of TG/HDL-c ratio with the phase of life at obesity onset and Metabolic Syndrome.

|                                | With MetS | Without MetS | p     | p<br>(Adjusted for DM2) |
|--------------------------------|-----------|--------------|-------|-------------------------|
| Early ages<br>(TG/HDL-c ratio) | 3.96      | 1.58         | 0.009 | 0.018                   |
| Late ages<br>(TG/HDL-c ratio)  | 3.70      | 2.06         | 0.080 | 0.234                   |

MetS: Metabolic Syndrome; DM2: Type 2 Diabetes mellitus. Early ages: ≤18 years; Late ages: >18 years. General Linear Model (GLM), p≤0.05.

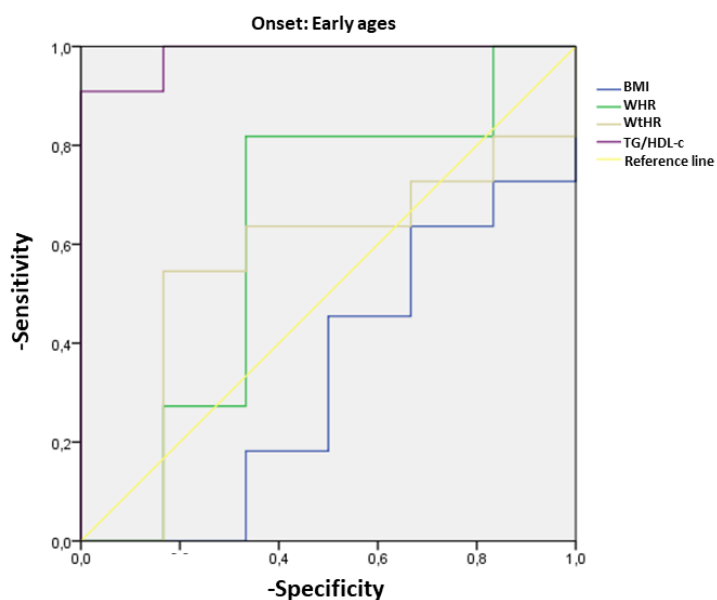

|                 |                |                   |
|-----------------|----------------|-------------------|
| BMI             | p= 0.269       | AUC=0.333         |
| WHR             | p=0.421        | AUC=0.621         |
| WtHR            | p=0.688        | AUC=0.561         |
| <b>TG/HDL-c</b> | <b>p=0.001</b> | <b>AUC= 0.985</b> |

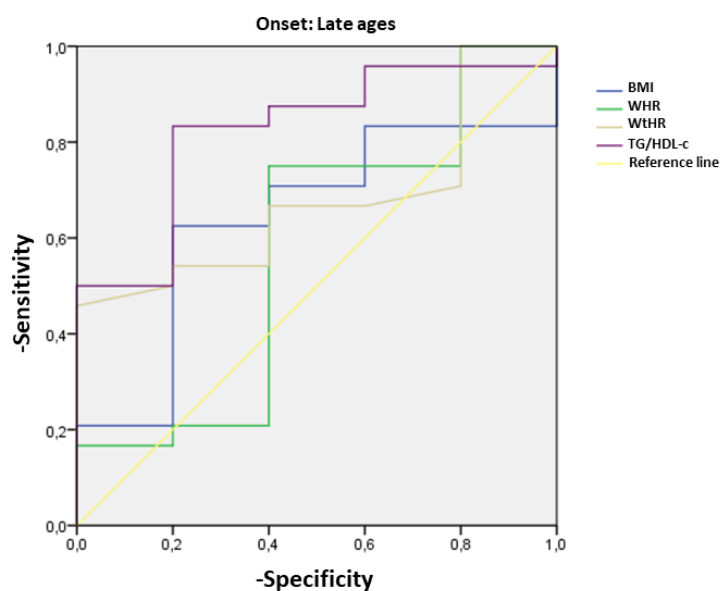

|                 |                |                   |
|-----------------|----------------|-------------------|
| BMI             | p= 0.326       | AUC=0.642         |
| WHR             | p=0.603        | AUC=0.575         |
| WtHR            | p=0.225        | AUC=0.675         |
| <b>TG/HDL-c</b> | <b>p=0.024</b> | <b>AUC= 0.825</b> |

**Figure S1.** Comparison of TG/HDL-c ratio with Body Mass Index (BMI), Waist-to-Hip ratio (WHR) and Waist-to-height ratio (WtHR).

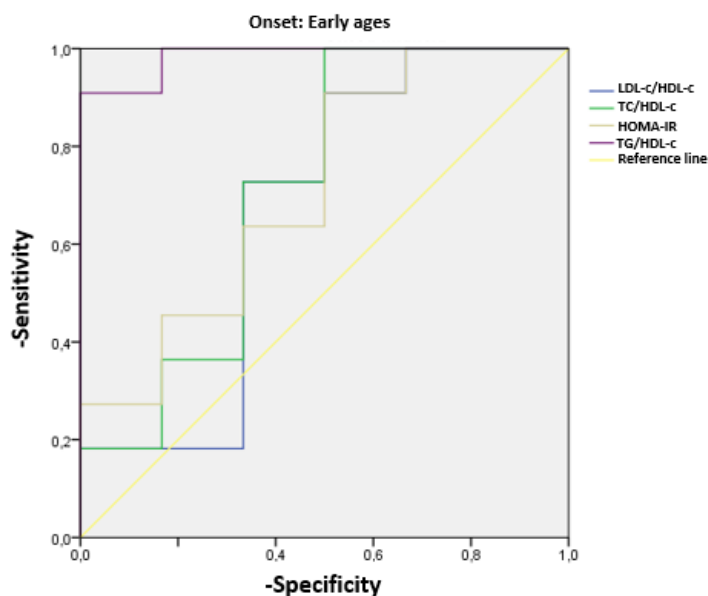

|                 |                |                  |
|-----------------|----------------|------------------|
| LDL-c/HDL-c     | p=0.269        | AUC=0.667        |
| TC/HDL-c        | p=0.159        | AUC=0.712        |
| HOMA-IR         | p=0.712        | AUC=0.159        |
| <b>TG/HDL-c</b> | <b>p=0.001</b> | <b>AUC=0.985</b> |

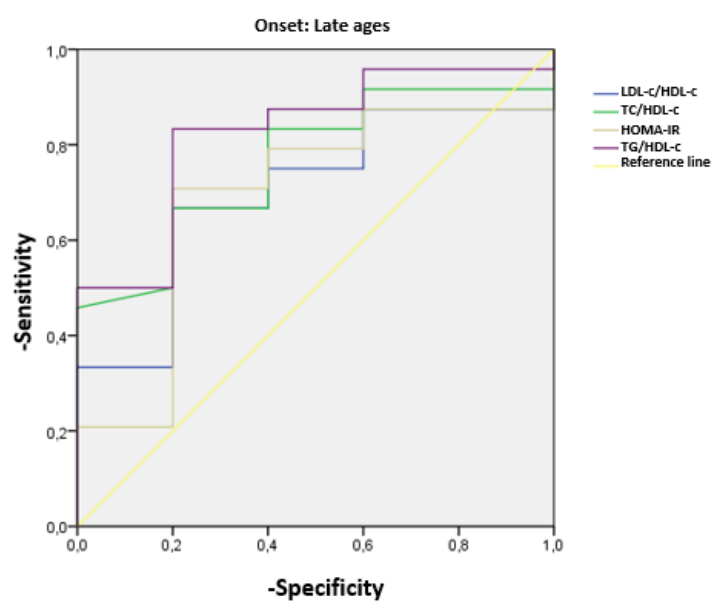

|                 |                |                  |
|-----------------|----------------|------------------|
| LDL-c/HDL-c     | p=0.166        | AUC=0.700        |
| TC/HDL-c        | p=0.069        | AUC=0.763        |
| HOMA-IR         | p=0.164        | AUC=0.682        |
| <b>TG/HDL-c</b> | <b>p=0.024</b> | <b>AUC=0.825</b> |

**Figure S2.** Comparison of TG/HDL-c ratio with Low-density lipoprotein to high density lipoprotein (LDL-c/HDL-c), Total Cholesterol to high-density lipoprotein (TC/HDL-c) and Homeostasis Model Assessment-Insulin Resistance (HOMA-IR).
